# Supplementary material for: Responses of aeolian desertification to a range of climate scenarios in China
Source: Copernicus journal article supplement (doi:10.5194/se-2016-59), 2016-04-13
Supplement: Supplementary file 1 [file se-2016-59-supplement.pdf]

1 Supporting Information

2 **1. Supporting Text**

3 **Text S1 Major regions of agriculture and grazing in China**

4 Over the past five decades, agricultural activities in China have been mainly concentrated in eastern,  
5 southern, southwestern and central China, but have been sporadic in western and northwestern  
6 China (Figure S5), meaning that it is likely that extensive aeolian desertification will occur in the  
7 latter regions. In addition, although grazing activities are mainly located in western and northern  
8 China where the risks of aeolian desertification are high, previous studies have also suggested that  
9 climate change has been a key influence on large scale aeolian desertification in these regions over  
10 past decades (Wang et al., 2008).

11 References

12 Wang, X., Chen, F., Hasi, E., Li, J.: Desertification in China: An assessment, *Earth-Sci. Rev.*, 88, 188–206, 2008.

13

14 **2. SI Figures**

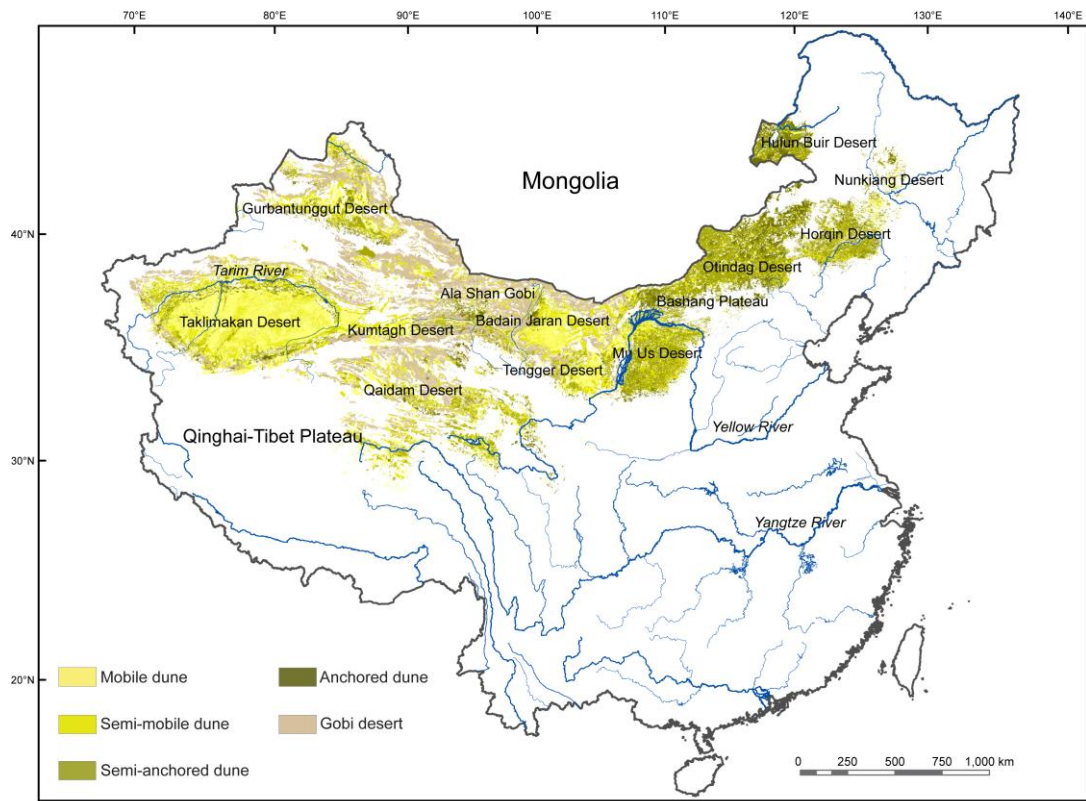

15

16 **Figure S1.** Distribution of the sandy and gobi deserts in China.

17

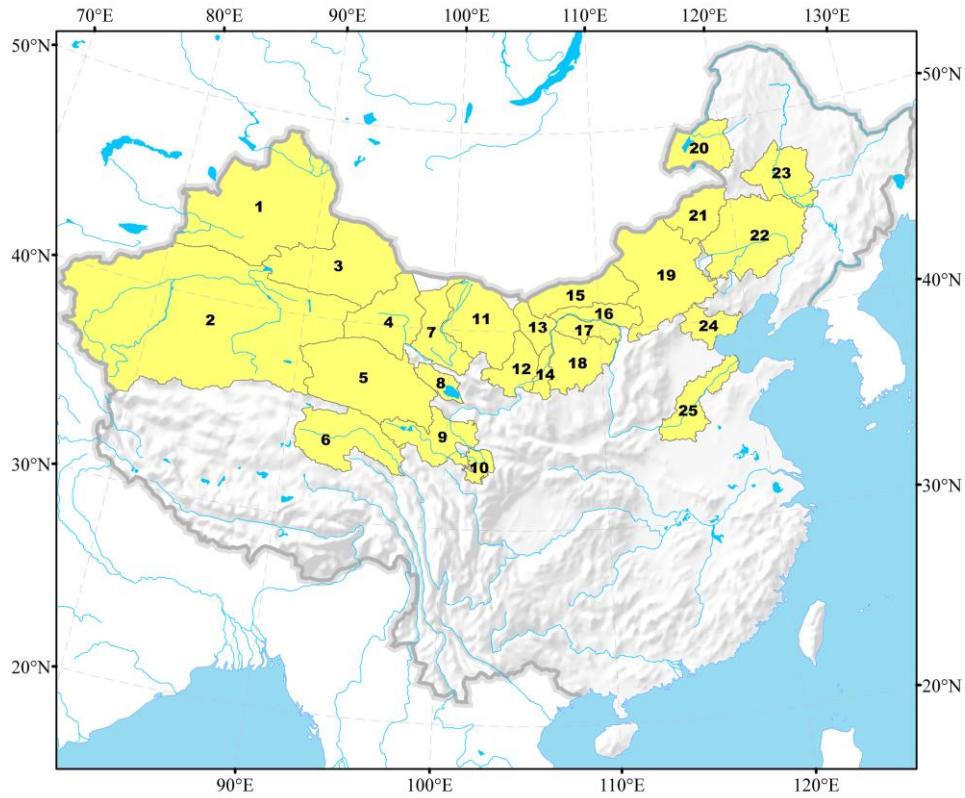

18

19 **Figure S2.** Areas monitored for aeolian desertification over the past decades in China.

20 Note: 1. Junggar Basin 2. Tarim Basin 3. Turpan-Kumul Basin 4. Kashgar Drainage area 5. Qaidam Basin 6.

21 Yangtze River Source 7. Heihe Drainage area 8. Qinghai Lake Basin 9. Yellow River Source 10. Zoige Plateau 11.

22 Badain Jaran Desert 12. Tengger Desert 13. Ulan Buh Desert 14. Northeast of Ningxia Province 15. Central Inner

23 Mongolia 16. Hetao Plain 17. Hobq Desert 18. Mu Us Desert 19. Otindag Desert 20. Hulun Buir Desert 21. Xilin

24 Gol Grassland 22. Horqin Desert 23. Nunkiang Desert 24. Luanhe-Yongding Drainage area 25. Lower Yellow River.

25

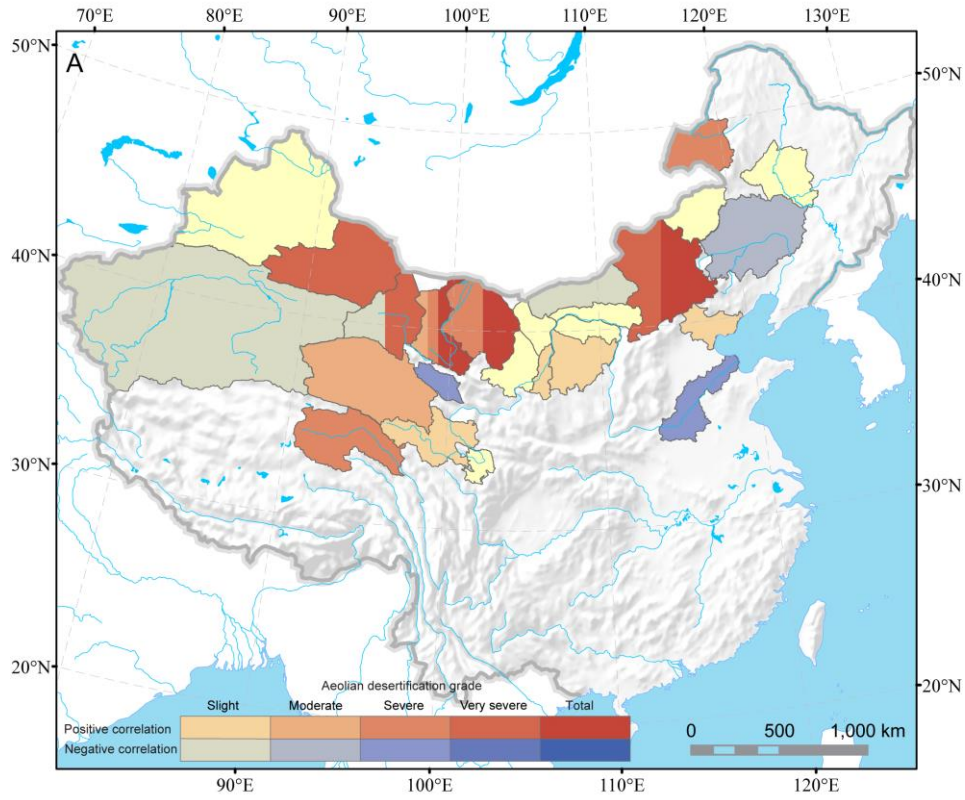

26

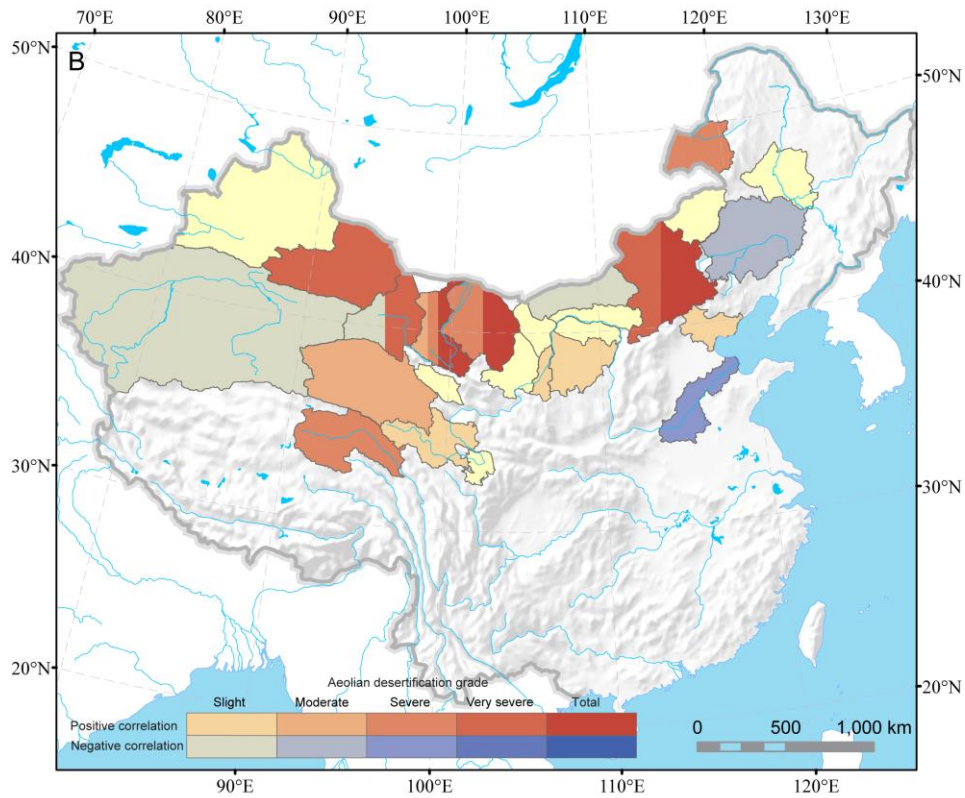

27

28 **Figure S3.** Relationships between the (a) NDVI and (b) VFC and trends in aeolian desertification.

29 For details see the supplementary text.

30

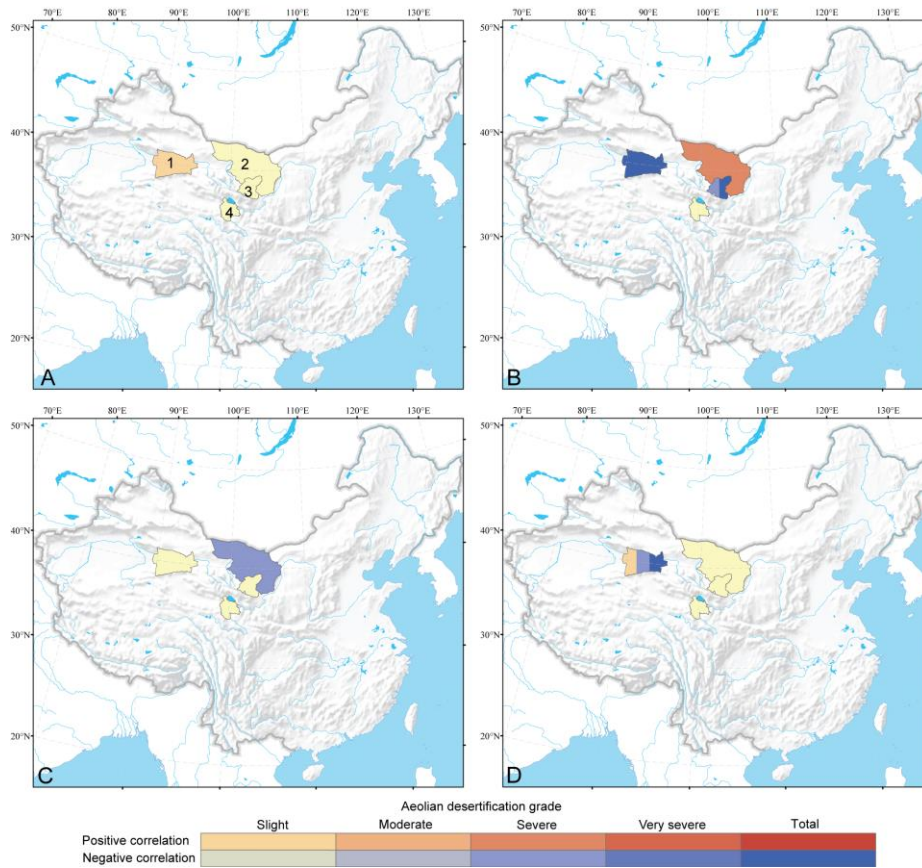

31

32 **Figure S4.** Relationships among the variations in the areas impacted by aeolian desertification and

33 (a) precipitation, (b) temperature, (c) wind velocity and (d) the Palmer Drought Severity Index

34 (PDSI) in the overlapping regions (1: Kumtagh Desert, 2: Ala Shan Plateau, 3: Shiyanghe Drainage

35 area, 4: Gonghe Basin). Regions with negative/positive correlations significant at the 0.05 level

36 (2-tailed) are shown in blue/red, and those that were not significant at the 0.05 level (2-tailed) are

37 shown in yellow.

38



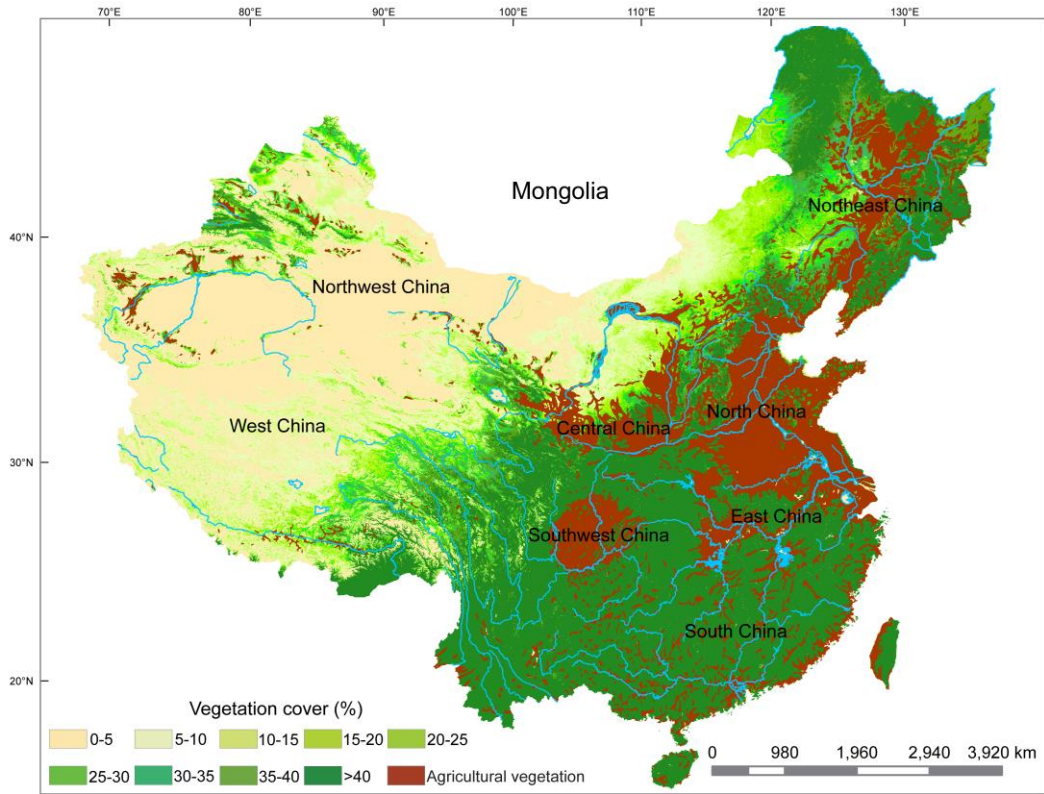

39

40 **Figure S5.** Vegetation cover and the major areas of agricultural activity in China.

41

42 **3. SI Tables**

43 **Table S1** Classification of aeolian desertification in China (modified after 32).

| Grade                    | Surface categories                                                                      |                                                                                               |                                                                         |                                                                         |                                                                                          |
|--------------------------|-----------------------------------------------------------------------------------------|-----------------------------------------------------------------------------------------------|-------------------------------------------------------------------------|-------------------------------------------------------------------------|------------------------------------------------------------------------------------------|
|                          | Anchored or semi-anchored dune or sand sheet                                            | Shrub                                                                                         | Gravel                                                                  | Eroded                                                                  | Rain-fed farmland                                                                        |
| Grade 1<br>(Slight)      | Blowouts occur on the stoss slope of dunes; the total area of mobile sands is 5% to 20% | Under shrubs little mobile sand accumulates                                                   | Gravels begin to become enriched on surface                             | Eroded shallow pits begin to develop                                    | Some sands accumulate in furrows, and erosion signals appear on plowing ridges           |
| Grade 2<br>(Moderate)    | Stoss and slip slopes appear, the total area of mobile sands is 20% to 50%              | Mobile sands appear on the stoss side of mounds, some gravels and sand appear on inter-mounds | Surface covered by coarse sands and gravels, grass cover >20%           | Large blowouts and small escarpments appear on surface                  | Patches of mobile sands appear, loss of thickness of humus layer is beyond 50%           |
| Grade 3<br>(Severe)      | Total area of mobile sands >50%                                                         | Vegetation cover <20% while area of mobile sands <50%                                         | Surface almost covered by gravels, grass cover varies between 5 and 20% | Deflation residuals appear on surface; graveled farmlands are abandoned | Humus layers are entirely lost, total area of mobile sand >20% and farmland is abandoned |
| Grade 4<br>(Very severe) | Mobile dunes or sand sheets, vegetation cover <5%                                       | Mobile dunes or sand sheets appear with vegetation cover <5%                                  | Surface entirely covered by gravels with vegetation cover <5%           | Deflation surface                                                       | Mobile sand sheets or gravel surface with vegetation cover <5%                           |

44

45

46 **Table S2** Climate index periods that correspond to the periods of aeolian desertification monitoring.

47 The NDVI and VFC data only became available after 1982; therefore, the averaged data from 1982

48 to 1990 were analyzed with the monitoring results of aeolian desertification from 1990.

| Monitoring period of aeolian desertification | Corresponded stage of temperature, precipitation, wind velocity, and PDSI | Corresponded stage of NDVI and VFC |
|----------------------------------------------|---------------------------------------------------------------------------|------------------------------------|
| Around 1975                                  | 1970-1975                                                                 | /                                  |
| 1990                                         | 1976-1990                                                                 | 1982-1990                          |
| 2000                                         | 1991-2000                                                                 | 1991-2000                          |
| 2005                                         | 2001-2005                                                                 | 2001-2005                          |
| 2010                                         | 2006-2010                                                                 | 2006-2010                          |

49

50



51 **Table S3A** Correlation between areas of aeolian desertification and temperature.

| Monitoring region             | Aeolian desertification classifications |                |                 |                 |                 |
|-------------------------------|-----------------------------------------|----------------|-----------------|-----------------|-----------------|
|                               | Slight                                  | Moderate       | Severe          | Very severe     | Total area      |
| Ala Shan Plateau              | -.300                                   | .800           | <b>1.000**</b>  | -.300           | .300            |
| Badain Jaran Desert           | -.700                                   | -.500          | -.300           | <b>.900*</b>    | -.300           |
| Qaidam Basin                  | -.100                                   | <b>-.900*</b>  | .700            | .300            | .600            |
| Gonghe Basin                  | .700                                    | .500           | -.700           | -.600           | -.700           |
| Heihe Drainage                | .100                                    | -.700          | -.300           | .200            | -.600           |
| Hulun Buir Desert             | <b>1.000**</b>                          | .600           | -.600           | -.400           | .600            |
| Lower Yellow River            | .783                                    | .600           | .100            | <b>-1.000**</b> | <b>-1.000**</b> |
| Yellow River Source           | <b>1.000**</b>                          | -.400          | .100            | .500            | .100            |
| Otindag Desert                | <b>.900*</b>                            | .300           | .300            | .600            | .600            |
| Horqin Desert                 | <b>.900*</b>                            | .500           | <b>.900*</b>    | -.100           | .700            |
| Hobq Desert                   | .300                                    | <b>1.000**</b> | <b>.900*</b>    | -.600           | .700            |
| Kumtagh Desert                | .600                                    | -.200          | -.700           | -.821           | <b>-.900*</b>   |
| Luanhe-Yongding Drainage      | .400                                    | .600           | .700            | -.800           | -.800           |
| Mu Us Desert                  | .700                                    | <b>.900*</b>   | <b>.900*</b>    | -.600           | .600            |
| Hetao Plain                   | <b>.900*</b>                            | .300           | -.200           | .100            | .600            |
| Central Inner Mongolia        | .600                                    | .200           | .600            | -.600           | .600            |
| Northeast of Ningxia Province | <b>.900*</b>                            | <b>.900*</b>   | .300            | -.700           | -.400           |
| Qinghai Lake Basin            | .300                                    | -.800          | <b>-.900*</b>   | -.200           | -.600           |
| Zoige Plateau                 | .400                                    | .500           | -.600           | -.100           | .100            |
| Shiyanghe Drainage            | .300                                    | -.800          | <b>-1.000**</b> | -.300           | <b>-1.000**</b> |
| Kachgar Drainage              | <b>.900*</b>                            | <b>-.900*</b>  | -.700           | -.600           | .000            |
| Nunkiang Desert               | .600                                    | .600           | .100            | -.100           | .500            |
| Tengger Desert                | .300                                    | .700           | -.700           | -.600           | <b>-.900*</b>   |
| Turpan-Kumul Basin            | <b>1.000**</b>                          | .600           | -.500           | -.600           | .600            |
| Ulan Buh Desert               | -.600                                   | -.300          | .600            | .100            | .800            |

|                      |                |                |               |       |       |
|----------------------|----------------|----------------|---------------|-------|-------|
| Xilin Gol Grassland  | <b>.900*</b>   | .300           | .400          | -.100 | .600  |
| Tarim Basin          | <b>.900*</b>   | -.800          | <b>-.900*</b> | -.700 | -.700 |
| Yangtze River Source | -.100          | .200           | .800          | .500  | .500  |
| Junggar Basin        | <b>1.000**</b> | <b>1.000**</b> | -.600         | -.700 | .100  |

52 \*\* . Correlation is significant at the 0.01 level (2-tailed).

53 \* . Correlation is significant at the 0.05 level (2-tailed).

54

55 **Table S3B** Correlation between areas of aeolian desertification and precipitation.

| Monitoring region             | Aeolian desertification classifications |               |               |               |               |
|-------------------------------|-----------------------------------------|---------------|---------------|---------------|---------------|
|                               | Slight                                  | Moderate      | Severe        | Very severe   | Total area    |
| Ala Shan Plateau              | -.700                                   | .800          | .700          | .300          | .700          |
| Badain Jaran Desert           | -.600                                   | -.100         | -.100         | .700          | -.100         |
| Qaidam Basin                  | .100                                    | -.600         | .300          | -.300         | .100          |
| Gonghe Basin                  | .700                                    | .300          | -.700         | -.600         | -.700         |
| Heihe Drainage                | .700                                    | <b>-.900*</b> | -.600         | -.600         | -.700         |
| Hulun Buir Desert             | -.600                                   | -.200         | .700          | .700          | -.200         |
| Lower Yellow River            | .671                                    | .500          | -.400         | -.200         | -.200         |
| Yellow River Source           | .200                                    | -.400         | <b>-.900*</b> | -.700         | <b>-.900*</b> |
| Otindag Desert                | -.700                                   | .100          | .500          | .200          | .200          |
| Horqin Desert                 | -.700                                   | -.300         | -.300         | .800          | -.100         |
| Hobq Desert                   | -.200                                   | .300          | .600          | -.100         | .000          |
| Kumtagh Desert                | <b>.900*</b>                            | .300          | -.700         | -.359         | -.600         |
| Luanhe-Yongding Drainage      | -.700                                   | -.700         | -.400         | .600          | .600          |
| Mu Us Desert                  | .100                                    | .700          | .700          | -.300         | .300          |
| Hetao Plain                   | .000                                    | .700          | .300          | .600          | .500          |
| Central Inner Mongolia        | -.400                                   | .200          | .600          | -.100         | .600          |
| Northeast of Ningxia Province | .100                                    | .100          | -.800         | .700          | <b>.900*</b>  |
| Qinghai Lake Basin            | .100                                    | -.600         | -.300         | <b>-.900*</b> | -.700         |
| Zoige Plateau                 | .000                                    | -.600         | .500          | .200          | .200          |
| Shiyanghe Drainage            | .200                                    | -.300         | -.800         | -.200         | -.800         |
| Kachgar Drainage              | <b>.900*</b>                            | -.600         | -.700         | <b>-.900*</b> | -.200         |
| Nunkiing Desert               | -.700                                   | .200          | .700          | .500          | .200          |
| Tengger Desert                | -.600                                   | .000          | .000          | .200          | -.200         |
| Turpan-Kumul Basin            | <b>.900*</b>                            | .800          | -.600         | -.300         | .700          |
| Ulan Buh Desert               | -.600                                   | .300          | .400          | .000          | .300          |

|                      |              |               |                 |               |               |
|----------------------|--------------|---------------|-----------------|---------------|---------------|
| Xilin Gol Grassland  | -.700        | .500          | .200            | .700          | .200          |
| Tarim Basin          | .700         | <b>-.900*</b> | <b>-1.000**</b> | <b>-.900*</b> | <b>-.900*</b> |
| Yangtze River Source | .500         | .700          | .300            | -.200         | -.200         |
| Junggar Basin        | <b>.900*</b> | <b>.900*</b>  | -.500           | <b>-.900*</b> | -.200         |

56 \*\* . Correlation is significant at the 0.01 level (2-tailed).

57 \* . Correlation is significant at the 0.05 level (2-tailed).

58

59 **Table S3C** Correlation between areas of aeolian desertification and wind velocity.

| Monitoring region             | Aeolian desertification classifications |                 |                 |               |              |
|-------------------------------|-----------------------------------------|-----------------|-----------------|---------------|--------------|
|                               | Slight                                  | Moderate        | Severe          | Very severe   | Total area   |
| Ala Shan Plateau              | .300                                    | -.800           | <b>-1.000**</b> | .300          | -.300        |
| Badain Jaran Desert           | <b>.900*</b>                            | -.100           | -.500           | -.700         | -.500        |
| Qaidam Basin                  | .200                                    | .800            | <b>-.900*</b>   | -.500         | -.700        |
| Gonghe Basin                  | -.500                                   | -.700           | .500            | .600          | .500         |
| Heihe Drainage                | .700                                    | -.100           | -.500           | -.600         | -.200        |
| Hulun Buir Desert             | <b>-1.000**</b>                         | -.600           | .600            | .400          | -.600        |
| Lower Yellow River            | -.447                                   | -.600           | -.400           | .700          | .700         |
| Yellow River Source           | -.800                                   | -.100           | -.500           | -.700         | -.500        |
| Otindag Desert                | -.800                                   | -.100           | -.500           | -.700         | -.700        |
| Horqin Desert                 | <b>-1.000**</b>                         | -.700           | -.700           | .300          | -.600        |
| Hobq Desert                   | -.300                                   | <b>-1.000**</b> | <b>-.900*</b>   | .600          | -.700        |
| Kumtagh Desert                | .200                                    | .600            | .100            | .616          | .500         |
| Luanhe-Yongding Drainage      | -.300                                   | -.300           | -.600           | .500          | .500         |
| Mu Us Desert                  | -.600                                   | <b>-1.000**</b> | <b>-1.000**</b> | .700          | -.300        |
| Hetao Plain                   | <b>-.900*</b>                           | -.300           | .200            | -.100         | -.600        |
| Central Inner Mongolia        | -.600                                   | -.200           | -.600           | .600          | -.600        |
| Northeast of Ningxia Province | -.300                                   | -.300           | -.600           | .400          | .300         |
| Qinghai Lake Basin            | -.300                                   | .700            | <b>.900*</b>    | -.200         | .600         |
| Zoige Plateau                 | .000                                    | <b>-.900*</b>   | .000            | -.700         | -.700        |
| Shiyanghe Drainage            | .500                                    | .600            | .600            | -.500         | .600         |
| Kachgar Drainage              | -.300                                   | .500            | .100            | -.200         | -.400        |
| Nunkiang Desert               | -.700                                   | -.700           | .000            | .300          | -.300        |
| Tengger Desert                | -.300                                   | -.700           | .700            | .600          | <b>.900*</b> |
| Turpan-Kumul Basin            | .300                                    | -.100           | .300            | <b>-.900*</b> | -.500        |
| Ulan Buh Desert               | .600                                    | .300            | -.600           | -.100         | -.800        |

|                      |                 |                 |               |       |               |
|----------------------|-----------------|-----------------|---------------|-------|---------------|
| Xilin Gol Grassland  | -.600           | -.800           | <b>-.900*</b> | -.600 | <b>-.900*</b> |
| Tarim Basin          | -.300           | .600            | .500          | .100  | .100          |
| Yangtze River Source | .500            | .200            | -.700         | -.700 | -.700         |
| Junggar Basin        | <b>-1.000**</b> | <b>-1.000**</b> | .600          | .700  | -.100         |

60 \*\* . Correlation is significant at the 0.01 level (2-tailed).

61 \* . Correlation is significant at the 0.05 level (2-tailed).

62



63 **Table S3D** Correlation between areas of aeolian desertification and PDSI.

| Monitoring region             | Aeolian desertification classifications |                 |                 |              |               |
|-------------------------------|-----------------------------------------|-----------------|-----------------|--------------|---------------|
|                               | Slight                                  | Moderate        | Severe          | Very severe  | Total area    |
| Ala Shan Plateau              | -.700                                   | .200            | .200            | .700         | .700          |
| Badain Jaran Desert           | -.700                                   | .200            | .300            | .600         | .300          |
| Qaidam Basin                  | -.500                                   | <b>-1.000**</b> | .500            | .100         | .300          |
| Gonghe Basin                  | .600                                    | .400            | -.600           | -.700        | -.600         |
| Heihe Drainage                | -.200                                   | -.600           | -.100           | .500         | -.500         |
| Hulun Buir Desert             | <b>-1.000**</b>                         | -.600           | .600            | .400         | -.600         |
| Lower Yellow River            | -.447                                   | -.200           | .000            | <b>.900*</b> | <b>.900*</b>  |
| Yellow River Source           | .300                                    | -.100           | -.400           | -.300        | -.400         |
| Otindag Desert                | -.700                                   | -.500           | -.100           | -.300        | -.300         |
| Horqin Desert                 | -.800                                   | -.700           | -.700           | .200         | -.400         |
| Hobq Desert                   | -.600                                   | .100            | .300            | .300         | .100          |
| Kumtagh Desert                | <b>.900*</b>                            | .500            | <b>-1.000**</b> | -.359        | <b>-.900*</b> |
| Luanhe-Yongding Drainage      | -.100                                   | -.500           | <b>-1.000**</b> | .700         | .700          |
| Mu Us Desert                  | -.600                                   | -.200           | -.200           | .300         | -.300         |
| Hetao Plain                   | <b>-.900*</b>                           | -.300           | .200            | -.100        | -.600         |
| Central Inner Mongolia        | -.700                                   | -.100           | -.300           | .500         | -.300         |
| Northeast of Ningxia Province | -.500                                   | -.800           | .100            | .500         | .200          |
| Qinghai Lake Basin            | -.500                                   | -.200           | -.500           | -.300        | <b>-.900*</b> |
| Zoige Plateau                 | .400                                    | .500            | -.600           | -.100        | .100          |
| Shiyanghe Drainage            | .300                                    | -.300           | -.700           | -.300        | -.700         |
| Kachgar Drainage              | .500                                    | -.800           | <b>-.900*</b>   | -.800        | -.600         |
| Nunkiang Desert               | -.600                                   | .500            | .600            | .600         | .400          |
| Tengger Desert                | .300                                    | .800            | -.800           | -.500        | -.400         |
| Turpan-Kumul Basin            | -.300                                   | .100            | -.300           | <b>.900*</b> | .500          |
| Ulan Buh Desert               | <b>-1.000**</b>                         | -.100           | -.200           | .700         | .400          |

|                      |               |       |               |       |       |
|----------------------|---------------|-------|---------------|-------|-------|
| Xilin Gol Grassland  | <b>-.900*</b> | -.300 | -.400         | .100  | -.600 |
| Tarim Basin          | .800          | -.600 | -.800         | -.600 | -.600 |
| Yangtze River Source | .300          | .400  | .400          | -.100 | -.100 |
| Junggar Basin        | .700          | .700  | <b>-.900*</b> | -.300 | .500  |

64 \*\*. Correlation is significant at the 0.01 level (2-tailed).

65 \*. Correlation is significant at the 0.05 level (2-tailed).

66

67 **Table S3E** Correlation between areas of aeolian desertification and NDVI.

| Monitoring region             | Aeolian desertification classifications |                 |                 |                |                |
|-------------------------------|-----------------------------------------|-----------------|-----------------|----------------|----------------|
|                               | Slight                                  | Moderate        | Severe          | Very severe    | Total area     |
| Ala Shan Plateau              | -.400                                   | .000            | -.600           | .800           | .400           |
| Badain Jaran Desert           | .000                                    | .800            | <b>1.000**</b>  | -.600          | <b>1.000**</b> |
| Qaidam Basin                  | .200                                    | <b>1.000**</b>  | .000            | .800           | .400           |
| Gonghe Basin                  | .800                                    | .600            | -.800           | -.800          | -.800          |
| Heihe Drainage                | -.800                                   | <b>1.000**</b>  | <b>1.000**</b>  | .000           | <b>1.000**</b> |
| Hulun Buir Desert             | -.600                                   | .200            | <b>1.000**</b>  | .600           | .200           |
| Lower Yellow River            | .211                                    | .000            | <b>-1.000**</b> | -.800          | -.800          |
| Yellow River Source           | <b>1.000**</b>                          | -.400           | -.400           | .200           | -.400          |
| Otindag Desert                | .200                                    | -.800           | .800            | <b>1.000**</b> | <b>1.000**</b> |
| Horqin Desert                 | -.400                                   | <b>-1.000**</b> | .600            | .800           | .800           |
| Hobq Desert                   | .400                                    | .800            | .400            | -.400          | .800           |
| Kumtagh Desert                | -.800                                   | -.600           | <b>1.000**</b>  | .632           | <b>1.000**</b> |
| Luanhe-Yongding Drainage      | <b>1.000**</b>                          | .800            | .400            | -.600          | -.600          |
| Mu Us Desert                  | <b>1.000**</b>                          | .800            | .800            | -.800          | .200           |
| Hetao Plain                   | .400                                    | .400            | -.800           | .200           | .800           |
| Central Inner Mongolia        | <b>-1.000**</b>                         | -.600           | .400            | .600           | .400           |
| Northeast of Ningxia Province | <b>1.000**</b>                          | .400            | .400            | -.800          | -.800          |
| Qinghai Lake Basin            | .400                                    | -.800           | <b>-1.000**</b> | -.800          | -.800          |
| Zoige Plateau                 | -.400                                   | .400            | .000            | -.200          | -.400          |
| Shiyanghe Drainage            | -.400                                   | -.400           | -.200           | .400           | -.200          |
| Kachgar Drainage              | <b>-1.000**</b>                         | .800            | .800            | <b>1.000**</b> | .800           |
| Nunkiang Desert               | .000                                    | .800            | .000            | .400           | .200           |
| Tengger Desert                | -.400                                   | -.400           | .400            | .400           | -.200          |
| Turpan-Kumul Basin            | -.800                                   | .200            | -.400           | <b>1.000**</b> | .400           |
| Ulan Buh Desert               | -.400                                   | .800            | .400            | -.400          | .000           |

|                      |                 |      |                |       |      |
|----------------------|-----------------|------|----------------|-------|------|
| Xilin Gol Grassland  | -.800           | .800 | .400           | .800  | .400 |
| Tarim Basin          | <b>-1.000**</b> | .400 | .800           | .800  | .800 |
| Yangtze River Source | .200            | .400 | <b>1.000**</b> | .400  | .400 |
| Junggar Basin        | .400            | .400 | -.800          | -.400 | .200 |

68 \*\* . Correlation is significant at the 0.01 level (2-tailed).

69 \* . Correlation is significant at the 0.05 level (2-tailed).

70

71 **Table S3F** Correlation between areas of aeolian desertification and VFC.

| Monitoring region             | Aeolian desertification classifications |                 |                 |                |                |
|-------------------------------|-----------------------------------------|-----------------|-----------------|----------------|----------------|
|                               | Slight                                  | Moderate        | Severe          | Very severe    | Total area     |
| Ala Shan Plateau              | -.400                                   | .800            | .400            | .200           | .400           |
| Badain Jaran Desert           | .000                                    | .800            | <b>1.000**</b>  | -.600          | <b>1.000**</b> |
| Qaidam Basin                  | .200                                    | <b>1.000**</b>  | .000            | .800           | .400           |
| Gonghe Basin                  | .400                                    | .000            | -.400           | -.400          | -.400          |
| Heihe Drainage                | -.800                                   | <b>1.000**</b>  | <b>1.000**</b>  | .000           | <b>1.000**</b> |
| Hulun Buir Desert             | -.600                                   | .200            | <b>1.000**</b>  | .600           | .200           |
| Lower Yellow River            | .211                                    | .000            | <b>-1.000**</b> | -.800          | -.800          |
| Yellow River Source           | <b>1.000**</b>                          | -.400           | -.400           | .200           | -.400          |
| Otindag Desert                | .200                                    | -.800           | .800            | <b>1.000**</b> | <b>1.000**</b> |
| Horqin Desert                 | -.400                                   | <b>-1.000**</b> | .600            | .800           | .800           |
| Hobq Desert                   | .400                                    | .800            | .400            | -.400          | .800           |
| Kumtagh Desert                | -.800                                   | -.600           | <b>1.000**</b>  | .632           | <b>1.000**</b> |
| Luanhe-Yongding Drainage      | <b>1.000**</b>                          | .800            | .400            | -.600          | -.600          |
| Mu Us Desert                  | <b>1.000**</b>                          | .800            | .800            | -.800          | .200           |
| Hetao Plain                   | .800                                    | -.200           | -.600           | -.400          | .400           |
| Central Inner Mongolia        | <b>-1.000**</b>                         | -.600           | .400            | .600           | .400           |
| Northeast of Ningxia Province | <b>1.000**</b>                          | .400            | .400            | -.800          | -.800          |
| Qinghai Lake Basin            | .200                                    | -.400           | -.800           | -.400          | -.400          |
| Zoige Plateau                 | -.400                                   | .400            | .000            | -.200          | -.400          |
| Shiyanghe Drainage            | -.400                                   | -.400           | -.200           | .400           | -.200          |
| Kachgar Drainage              | <b>-1.000**</b>                         | .800            | .800            | <b>1.000**</b> | .800           |
| Nunkiang Desert               | .000                                    | .800            | .000            | .400           | .200           |
| Tengger Desert                | -.400                                   | -.400           | .400            | .400           | -.200          |
| Turpan-Kumul Basin            | -.800                                   | .200            | -.400           | <b>1.000**</b> | .400           |
| Ulan Buh Desert               | -.400                                   | .800            | .400            | -.400          | .000           |

|                      |                 |      |                |       |      |
|----------------------|-----------------|------|----------------|-------|------|
| Xilin Gol Grassland  | -.800           | .800 | .400           | .800  | .400 |
| Tarim Basin          | <b>-1.000**</b> | .400 | .800           | .800  | .800 |
| Yangtze River Source | .200            | .400 | <b>1.000**</b> | .400  | .400 |
| Junggar Basin        | .400            | .400 | -.800          | -.400 | .200 |

72 \*\* . Correlation is significant at the 0.01 level (2-tailed).

73 \* . Correlation is significant at the 0.05 level (2-tailed).
