# Supplementary material for: Responses of aeolian desertification to a range of climate scenarios in China
Source: Copernicus journal article supplement (doi:10.5194/se-2016-59), 2016-04-13
Supplement: Supplementary file [file se-2016-59-RC1-supplement.pdf]

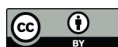

## Responses of aeolian desertification to a range of climate scenarios in China

Xunming Wang<sup>1,2</sup>, Ting Hua<sup>1,2</sup>, Wenyong Ma<sup>1</sup>

<sup>1</sup>Key Laboratory of Water Cycle and Related Land Surface Processes, Institute of Geographic Sciences and Natural Resources Research, Chinese Academy of Sciences, Beijing 100101, China

5 <sup>2</sup>Key Laboratory of Desert and Desertification, Cold and Arid Regions Environmental and Engineering Research Institute, Chinese Academy of Sciences, Lanzhou 730000, China

Correspondence to: Xunming Wang ([xunming@igsnr.ac.cn](mailto:xunming@igsnr.ac.cn))

**Abstract.** Aeolian desertification plays an important role in earth-system processes and ecosystems, and has the potential to greatly impact on global food production. The occurrence of aeolian  
10 desertification has traditionally been attributed to increases in wind velocity and temperature, and decreases in precipitation. In this study, by integrating the aeolian desertification monitoring data and climate and vegetation indices, we found that although aeolian desertification is influenced by complex climate patterns and human activities, increases in precipitation and temperature, and decreases in wind speed, may also trigger aeolian desertification in China. Our results show that,  
15 even when modern technical approaches are used, different approaches to desertification need to be applied to account for regional differences. These results have important implications for future policy decisions on how best to combat desertification.

### 1 Instruction

In China, aeolian desertification mainly occurs when ored or semi-anchored dunes are  
20 reactivated (Zhang et al., 2014; Wang et al., 2015), and when arable land and grassland are degraded to such a degree that aeolian transport is exacerbated by decreases in vegetation cover or increases in the intensity of aeolian processes (Wang et al., 2005; Houyou et al., 2014;

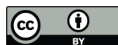

Martínez-Graña et al., 2015). Over the past five decades, there have been several periods with high or low rates of dune reactivation and degradation of arable land and grassland, with corresponding

25 occurrences of desertification and rehabilitation. Aeolian desertification may give rise to land surfaces that can no longer support cultivation or husbandry (UNCD, 1977; United Nations, 1992), and cause decreases in biomass and species richness, loss of herbaceous species, and reductions in crop and meat production (Schlesinger et al., 1990; Reynolds et al., 2001; Wang et al., 2008; Okin et al., 2009). Land that is at risk from aeolian desertification in China is mainly located on the

30 boundaries of sandy and gobi deserts. The affected area stretches from central Asia in the west to northeastern China in the east, and covers more than 1.83 million km<sup>2</sup> (DCSNBSC, 2005; State of Forestry Administration of China, 2011) and occupies almost 70% of the total area at risk from desertification. This land is currently managed as traditional pastoral and agricultural systems, but if aeolian desertification continues to expand the livelihoods of nearly 400 million people will be

35 jeopardized (DPSSTS, 2002). By the mid-2000s, costs associated with the loss of loess attributable to aeolian desertification exceeded 50 billion RMB (approximately 8 billion USD) (Central People's Government of the People's Republic of China, 2005).

Increases in wind speed and decreases in precipitation have traditionally been considered to increase aeolian processes, erode fine particles and nutrients from soil surfaces (Xu and Zhang,

40 2014; Xie et al., 2015), and trigger aeolian desertification (Okin and Gillette, 2001; Field et al., 2009; Sankey et al., 2012). Aeolian processes may also impact on ecosystems (Vieira et al., 2015), as windblown dust inputs can contribute to soil formation and provide essential nutrients (Reynolds et al., 2007), indirectly moderate plant communities in the receiving area (Munson et al., 2011), promote land rehabilitation, and introduce plants to areas far from their natural habitat. In addition,



45 although there is uncertainty regarding the contribution of variations in temperature to global  
terrestrial net primary production (Balling, 1991; Nemani et al., 2003), **it has been predicted that**  
**global warming in the early 21<sup>st</sup> century may promote rehabilitation of most of the regions of China**  
**currently at risk from desertification** (Wang et al., 2009; Miao et al., 2015).

Given the huge potential risks to ecological security, pastoral and agricultural systems, and  
50 crop and meat production posed by aeolian desertification, national and district level governments  
in China implemented numerous programs between the 1970s and early 2010s (Zhu, 1994;  
Ministry of Science and Technology of the People's Republic of China, 2005) to extensively  
monitor, mitigate, and control aeolian desertification throughout China. **Even though the**  
**effectiveness of some desertification control programs has been questionable** (Wang et al., 2010),  
55 **and the impacts of human activity on desertification have been overestimated** (Wang et al., 2006),  
to date, no consideration has been given to variations in the predominant climatic factors and their  
impact on desertification. Without robust testing, the most common mitigation measures applied  
throughout China have been afforestation, conversion of tilled land to forestry and grassland, and  
prevention of grazing (The State Council of People's Republic of China, 2002; 2007).

60 Even with modern technological tools, the principle methods used to mitigate aeolian  
desertification in China still rely on improved ure conditions and decreases in wind velocity  
(The Central People's Government of the People's Republic of China, 2013). However, regional  
differences mean that, in some regions, the process of desertification is highly sensitive to  
variations in precipitation, whereas in other regions it is highly sensitive to variations in wind  
65 velocity and temperature (Wang et al., 2008). In this study, we integrated variations in trends in  
temperature, wind velocity, and precipitation, and determined their relationships with aeolian



desertification in China.

## 2 Materials and methods

### 2.1 Materials

#### 70 2.1.1 Aeolian desertification monitoring programs

There have been five Aeolian desertification monitoring campaigns over the past 40 years. Based on these monitoring results, and using the monitoring criteria listed in Table S1, aeolian desertification has been categorized into four aeolian desertification, namely: slight, moderate, severe, and very severe. Subsequently, the entire area of China at risk from aeolian desertification was divided into 29 areas (4 overlapping regions were excluded from the main part of this contribution and the results have been included in the supplementary material) using the monitoring criteria (Figure S2). Monitoring was carried out in 1975, 1990, 2000, 2005, and 2010, and detailed results have been reported by (Wang, 2014). These monitoring programs mainly involved remote sensing and field investigations, and statistical analysis showed that in regions with a high risk of aeolian desertification, there were no close relationships between vegetation conditions and the results of aeolian desertification (Figure S2).

#### 2.1.2 NDVI data

The Normalized Difference Vegetation Index (NDVI) dataset for the period 1982–2010 was acquired from the third generation Global Inventory Modeling and Mapping Studies (GIMMS) NDVI dataset (Pinzon and Tucker, 2014). This dataset has a spatial resolution of  $1/12^\circ \times 1/12^\circ$  and a temporal resolution of 15 days. The highest NDVI value from each 15-day period was extracted and combined into the annual NDVI data using the maximum value compositing (MVC) technique (Holben, 1986).



### 2.1.3 Vegetation cover data

90 The NDVI method for the dimidiate pixel model was used to acquire the vegetation fractional  
cover data (VFC) (Wittich and Hansing, 1995; Xiao and Moddy, 2005), which is expressed as  
follows:

$$VFC = (NDVI - NDVI_{soil}) / (NDVI_{veg} - NDVI_{soil}) \quad (1)$$

where  $NDVI_{soil}$  is the NDVI value of a bare surface or of an area with no vegetation cover, and 

95  $NDVI_{veg}$  is the NDVI value of an area with full vegetation cover.

### 2.1.4 Temperature, precipitation, and wind velocity data

Temperature, precipitation, and wind velocity data from 750 meteorological stations around China  
were acquired from the Chinese Meteorological Administration. Mean annual data were spatially  
interpolated using the inverse-distance-weight (IDW) method. 

### 100 2.1.5 PDSI data

Monthly values of the Palmer Drought Severity Index (PDSI) with a temporal resolution of  $2.5^\circ \times$   
 $2.5^\circ$  were used to evaluate variations in atmospheric moisture supply and demand (Palmer, 1965).  
This index incorporated the antecedent and current moisture supply and demand into a hydrological  
model that includes a two-layer bucket type model for soil moisture calculations (Dai et al., 2004).

### 105 2.2 Methods

In order to estimate the relationship between aeolian desertification and climate factors, Spearman  
correlation coefficients were calculated between areas of aeolian desertification and the climate  
indices in the overlapping monitoring regions. Before the Spearman correlations were performed,  
all climate and vegetation indices were divided into periods that corresponded with the monitoring

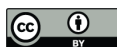

110 intervals for aeolian desertification (Table S2). In addition, the NDVI and VFC data only became  
available after 1982; therefore, the averaged data from 1982 to 1990 were analyzed with the  
monitoring results of aeolian desertification from 1990.

### 3 Results and discussion

Our results show that, for most regions with high risks of aeolian desertification, variations in  
115 precipitation and the occurrence of aeolian desertification are not closely related (Figure 1a), and  
increases in precipitation have only beneficial to the rehabilitation that has taken place in areas such  
as the Tarim Basin, the source area of the Yellow River, the Qinghai Lake Basin, and the Heihe and  
Kashgar Drainage areas. In contrast, in areas such as the Junggar Basin, the Turpan-Kumul Basin,  
the Kashgar Drainage Basin, and the northeastern autonomous region of Ningxia, increases in  
120 precipitation gave rise to slight to moderate aeolian desertification.

#### Figure 1

As with the response of aeolian desertification to variations in precipitation, the responses of  
aeolian desertification to various degrees of temperature increase were variable (Figure 1b). In  
China, increases in temperature are beneficial for rehabilitation in areas where there is a high risk  
of aeolian desertification, such as the Tarim Basin, the Kashgar Drainage area, the Qaidam Basin,  
125 Qinghai Lake Basin, the Tangier Desert, and the lower reaches of the Yellow River that have been  
classified with different desertification grades. Further, our results show that, for most regions,  
there are no close relationships between variations in wind velocity and aeolian desertification  
(Figure 1c), and increases in wind velocity resulted in aeolian desertification only in areas such as  
the Qinghai Lake Basin, and the Badain Jaran and Tengger deserts. In particular, our statistical  
130 results show that increases in wind speed may promote rehabilitation in areas with changeable

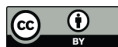

aeolian desertification grades, such as the Junggar Basin, the Turpan-Kumul Basin, the Qaidam Basin, the Zoige Plateau, the Mu Us Desert, and the Xilin Gol Grasslands. 

Similar to the relationships between aeolian desertification and variations in precipitation, temperature, and wind velocity, there are also spatial variations in the responses of aeolian desertification to surface soil moisture conditions (Figure 1d). For example, correlation analysis between the Palmer Drought Severity Index (PDSI) and areas impacted by aeolian desertification shows that increases in soil moisture may result in rehabilitation in the Junggar Basin, the Kachgar Drainage area, the Qaidam Basin, the Luanhe-Yongding drainage area, and Qinghai Lake basin regions, but may trigger slight aeolian desertification in the Turpan-Kumul Basin and the lower reaches of the Yellow River, which is not consistent with the conventional perception that increases in the PDSI may improve rehabilitation of the region (Jeong et al., 2011; Peters et al., 2012). In addition, our results show that, just as there is variation between the monitoring areas, the correlations between the areas impacted by aeolian desertification and climate indices are also variable. Within limited areas, the degree of aeolian desertification is highly sensitive to the intensity of the aeolian processes (Wang et al., 2008), which results in variable relationships between the responses of aeolian desertification and climate indices. These results also suggest that regionalization is a vital issue for desertification mitigation programs. Furthermore, although the impacts of climate change on land degradation are only visible after a relatively long period (Herrmann et al., 2005; Vicente-Serrano et al., 2013), monitoring results that extend beyond periods of five years indicate that, in addition to the lagged responses of aeolian desertification to various climate indices, increases in precipitation and temperature, and decreases in wind velocity, may also trigger aeolian desertification at the regional scale, and may therefore introduce uncertainty



into assessments of the impacts of climate change on landscape evolution.

Over the past five decades, human activities such as reclamation and increased grazing  
155 intensity in China may have accelerated the process of aeolian desertification (Wang et al., 2006);  
however, other human activities that can be beneficial to rehabilitation, such as afforestation,  
conversion of tilled land to forestry and grassland, and prevention of grazing, have also been put  
into practice (Cao et al., 2011). To some degree, the inconsistency of these practices has also  
contributed to the confusing response of aeolian desertification to various climate indices.  
160 Nevertheless, regions with high risks of aeolian desertification in China are mainly concentrated in  
arid, semiarid, and semi-humid areas, within which the intensity of human activity is very low (SI  
Text S1). Therefore, despite the undeniable impact of human activities in China, the role of climate  
change on desertification and rehabilitation may be more important (Wang et al., 2006).

#### 4 Conclusions

165 Although increases in precipitation and surface soil moisture conditions, and decreases in wind  
velocity may promote rehabilitation over longer timescales and across larger spatial scales, they  
also may trigger aeolian desertification in some areas. Monitoring of aeolian desertification in China  
over recent decades shows that desertification has responded in various ways to climate indices.  
Even when modern technical approaches are applied, the complex patterns of climate and human  
170 activities, and the variability between regions, mean that a range of desertification control practices  
should be applied. This information has important implications for future policy decisions on how  
best to combat desertification.

Acknowledgements. This work was supported by the National Science Foundation for Distinguished Young  
Scholars of China (No. 41225001). Special thanks are given to the anonymous referees for their critical comments.



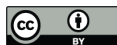

175 **References**

- Balling, R. C. Jr.: Impact of desertification on regional and global warming, *Bull. Amer. Meteorol. Soc.*, 72, 232–234, 1991.
- Cao, S., Chen, L., Shankman, D., Wang, C., Wang, X., and Zhang, H.: Excessive reliance on afforestation in China's arid and semi-arid regions, Lessons in ecological restoration, *Earth-Sci. Rev.*, 104, 240–245, 2011.
- 180 Central People's Government of the People's Republic of China.: Available at [www.gov.cn/gongbao/content/2005/content\\_91640.htm](http://www.gov.cn/gongbao/content/2005/content_91640.htm), Accessed September 8, 2005.
- Dai, A., Trenberth, K. E., and Qian, T.: A global dataset of Palmer Drought Severity Index for 1870–2002, Relationship with soil moisture and effects of surface warming, *J. Hydrometeorol.*, 5, 1117–1130, 2004.
- Department of Population, Social, Science and Technology Statistics.: National Bureau of Statistics of China
- 185 (DPSSTS) China Population Statistics Yearbook 2002, China Statistics Press, Beijing, 2002.
- Department of Comprehensive Statistics of the National Bureau of Statistics of China (DCSNBSC): China Compendium of Statistics 1949–2004, China Statistics Press, Beijing, 2005.
- Department of Population, Social, Science and Technology Statistics. National Bureau of Statistics of China (DPSSTS): China Population Statistics Yearbook 2002, China Statistics Press, Beijing, 2002.
- 190 Field, J. P., Breshears, D. D., and Whicker, J. J.: Toward a more holistic perspective of soil erosion, why aeolian research needs to explicitly consider fluvial processes and interactions, *Aeolian Res.*, 1, 9–17, 2009.
- Herrmann, S. M., Anyamba, A., and Tucker, C. J.: Recent trends in vegetation dynamics in the African Sahel and their relationship to climate, *Global Environ. Change*, 15, 394–404, 2005.
- Holben, B. N.: Characteristics of maximum-value composite images from temporal AVHRR data, *Int. J. Remote*
- 195 *Sens.*, 7, 1417–1434, 1986.
- Houyou, Z., Biielders, C.L., Benhorma, H.A., Dellal, A., and Boutemdjet, A.: Evidence of strong land degradation



- by wind erosion as a result of rainfed cropping in the algerian steppe: A case study at laghouat, *Land Degrad. & Dev.*, doi 10.1002/ldr.2295, 2014.
- Jeong, S., H.o C., Brown, M. E., Kug, J., and Piao, S.: Browning in desert boundaries in recent decades, *J. Geophys. Res.*, 116, D02103, 2011.
- 200 Mart íez-Gra ña, A.M., Goy, J.L., and Zazo, C.: Cartographic Procedure for the Analysis of Aeolian Erosion Hazard in Natural Parks (Central System, Spain), *Land Degrad. & Dev.*, 26 (2), 110–117, 2015.
- Miao, L., Moore, J.C., Zeng, F., Lei, J., Ding, J., He, B., and Cui, X.: Footprint of Research in Desertification Management in China, *Land Degrad. & Dev.*, 26 (5), 450–457, 2015
- 205 Ministry of Science and Technology of the People's Republic of China.: Available at [www.most.gov.cn/kjbgz/200511/t20051115\\_26114.htm](http://www.most.gov.cn/kjbgz/200511/t20051115_26114.htm). Accessed November 15, 2005.
- Munson, S. M., Belnap, J., and Okin, G. S.: Responses of wind erosion to climate-induced vegetation changes on the Colorado Plateau, *Proceed. Natl. Acad. Sci. U.S.A.*, 108, 3854–3859, 2011.
- Nemani, R. R., Keeling, C. D., Hshimoto, H., Jolly, W. M., Piper, S. C., Tucker, C. J., Myneni, R. B., and Running, S. W.: Climate-driven increases in global terrestrial net primary production from 1982 to 1999 *Science*, 300, 1560–1563, 2003.
- 210 Okin, G. S., and Gillette, D. A.: Distribution of vegetation in wind-dominated landscapes, implications for wind erosion modeling and landscape processes, *J. Geophys. Res.*, 106, 9673–9683, 2001.
- Okin, G. S., Parsons, A. J., Wainwright, J., Herrick, J. E., Bestelmeyer, B. T., Peters, D. C., and Fredrickson, E.: Do
- 215 Changes in Connectivity Explain Desertification? *BioScience*, 59, 237–244, 2009.
- Palmer, W. C.: Meteorological drought. U.S. Dept. of Commerce, 1965.
- Peters, D. P. C., Yao, J., Sala, O., and Anderson, J. P.: Directional climate change and potential reversal of desertification in arid and semiarid ecosystems, *Global Change Biol.*, 18, 151–163, 2012.



- Pinzon, J. E., and Tucker, C. J.: A non-stationary 1981–2012 AVHRR NDVI3g time series, *Remote Sens.*, 6,  
220 6929–6960, 2014.
- Reynolds, J. F., Smith, D. M. S., Lambin, E. F., Turner II, B. L., Mortimore, M., Batterbury, S. P. J., Downing, T. E.,  
Dowlatabadi, H., Fernandez, R. J., Herrick, J. E., Huber-Sannwald, E., Jiang, H., Leemans, R., Lynam, T.,  
Maestre, F. T., Ayarza, M., and Walker, B.: Global desertification, Building a science for dryland development,  
*Science*, 316, 847–851, 2007.
- 225 Reynolds, R., Belnap, J., Reheis, M., Lamothe, P., and Luiszer, F.: Aeolian dust in Colorado Plateau soils, Nutrient  
inputs and recent change in source, *Proceed. Natl. Acad. Sci. U.S.A.*, 98, 7123–7127, 2001.
- Sankey, J. B., Germino, M. J., Benner, S. G., Glenn, N. F., and Hoover, A. N.: Transport of biologically important  
nutrients by wind in an eroding cold desert, *Aeolian Res.*, 7, 17–27, 2012.
- Schlesinger, W. H., Reynolds, J. F., Cunningham, G. L., Huenneke, L. F., Jarrell, W. M., Virginia, R. A., and  
230 Whitford, W. G.: Biological feedbacks in global desertification, *Science*, 247, 1043–1048, 1990.
- State Forestry Administration of China.: A bulletin of status quo of desertification and sandification in China  
([www.gov.cn/gongbao/content/2005/content\\_91640.htm](http://www.gov.cn/gongbao/content/2005/content_91640.htm)). 2011.
- The State Council of the People's Republic of China.: Available at  
[www.gov.cn/gongbao/content/2002/content\\_61463.htm](http://www.gov.cn/gongbao/content/2002/content_61463.htm). Accessed April 11, 2002.
- 235 The State Council of the People's Republic of China.: Available at  
[www.gov.cn/zwggk/2007-08/14/content\\_716617.htm](http://www.gov.cn/zwggk/2007-08/14/content_716617.htm). Accessed August 9, 2007.
- The Central People's Government of the People's Republic of China.: Available at  
[www.gov.cn/gzdt/2013-03/21/content\\_2359269.htm](http://www.gov.cn/gzdt/2013-03/21/content_2359269.htm). Accessed March 21, 2013.
- UN Secretariat of the Conference on Desertification (UNCD). (Ed): *Desertification, Its Causes and Consequences*  
240 United Nations, Pergamon Press, New York, 1977.



- United Nations Results of the World Conference on Environment and Development, Agenda 21. UNCED.: United Nations Conference on Environment and Development, Rio de Janeiro, United Nations, New York, 1992.
- Vicente-Serrano, S. M., Gouveia, C., Camarero, J. J., Begueria, S., Trigo, R., Lopez-Moreno, J. I., Azorin-Molina, C., Pasho, E., Lorenzo-Lacruz, J., Revuelto, J., Moran-Tejeda, E., and Sanchez-Lorenzo, A.: Response of  
245 vegetation to drought time-scales across global land biomes, *Proceed. Natl. Acad. Sci. U.S.A.*, 110, 52–57, 2013.
- Vieira, R.M.S.P., Tomasella, J., Alvalá R.C.S., Sestini, M.F., Affonso, A.G., Rodriguez, D.A., Barbosa, A.A., Cunha, A.P.M.A., Valles, G.F., Crepani, E., De Oliveira, S.B.P., De Souza, M.S.B., Calil, P.M., De Carvalho, M.A., Valeriano, D.M., Campello, F.C.B., and Santana, M.O.: Identifying areas susceptible to desertification in the  
250 Brazilian northeast, *Solid Earth*, 6 (1), 347–360, 2015.
- Wang, T.: Atlas of sandy desert and aeolian desertification in Northern China, Science Press, Beijing, 2014.
- Wang, T., Xue, X., Zhou, L., and Guo J.: Combating Aeolian Desertification in Northern China, *Land Degrad. & Dev.*, 26 (2), 118–132, 2015.
- Wang, X., Chen, F., Dong, Z., and Xia, D.: Evolution of the southern Mu Us Desert in North China over the past 50  
255 years, an analysis using proxies of human activity and climate parameters, *Land Degrad. & Dev.*, 16, 351–366, 2005.
- Wang, X., Chen, F., and Dong, Z.: The relative role of climatic and human factors in desertification in semi-arid China, *Global Environ. Change*, 16, 48–57, 2006.
- Wang, X., Chen, F., Hasi, E., and Li, J.: Desertification in China, An assessment, *Earth-Sci. Rev.*, 88, 188–206,  
260 2008.
- Wang, X., Yang, Y., Dong, Z., and Zhang, C.: Responses of dune activity and desertification in China to global warming in the twenty-first century, *Global Planet. Change*, 67, 167–185, 2009.
- Wang, X., Zhang, C., Hasi, E., and Dong, Z.: Has the Three Norths Forest Shelterbelt Program solved the



- desertification and dust storm problems in arid and semiarid China? *J. Arid Environ.*, 74, 13–22, 2010.
- 265 Wittich, K. P., and Hansing, O.: Area-averaged vegetative cover fraction estimated from satellite data, *Int. J. Biometeorol.*, 38, 209–215, 1995.
- Xiao, J., and Moddy, A.: A comparison of methods for estimating fractional green vegetation cover within a desert-to-upland transition zone in central New Mexico, USA, *Remote Sens. Environ.*, 98, 237–250, 2005.
- Xie, L.W., Zhong, J., Chen, F.F., Cao, F.X., Li, J.J., and Wu, L.C.: Evaluation of soil fertility in the succession of karst rocky desertification using principal component analysis, *Solid Earth*, 6 (2), 515–524.
- 270 Xu, E.Q., and Zhang, H.Q.: Characterization and interaction of driving factors in karst rocky desertification: A case study from Changshun, China, *Solid Earth*, 5 (2), 1329–1340, 2014.
- Zhang, K., Qu, J., Han, Q., Xie, S., Kai, K., Niu, Q., and An, Z.: Wind tunnel simulation of windblown sand along China's Qinghai-Tibet railway, *Land Degrad. & Dev.*, 25 (3), 244–250, 2014.
- 275 Zhu, Z.: Development trend of sandy desertification in interland agro-pastoral region of northern China in recent ten years, *J. Desert Res.*, 14, 1–7, 1994.



## Figures

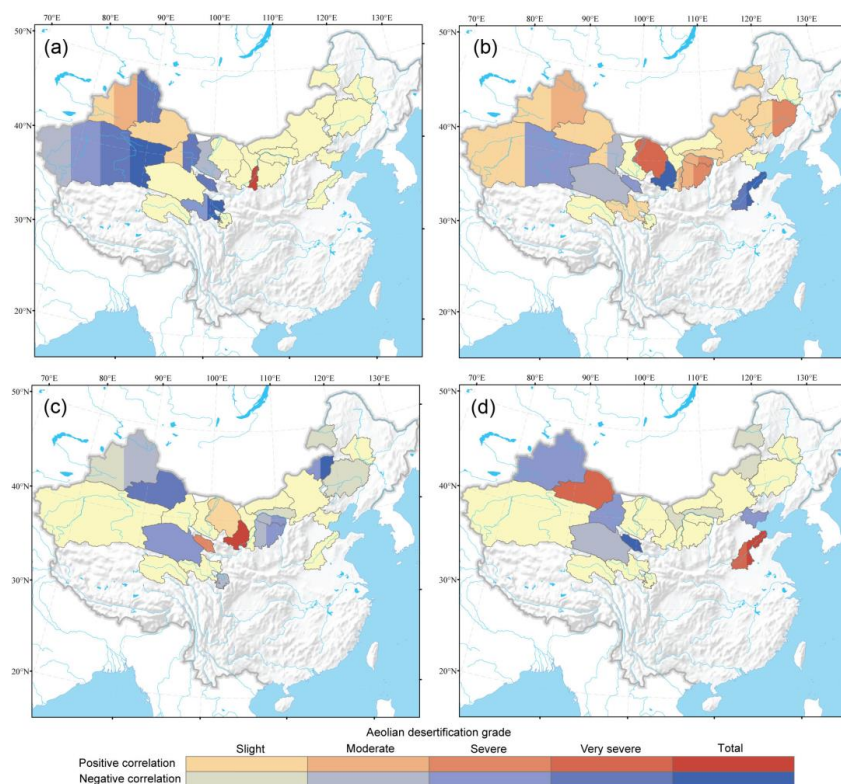

280 **Figure 1.** Spearman correlations between variations in areas of aeolian desertification and (a)  
precipitation, (b) temperature, (c) wind velocity, and (d) the Palmer Drought Severity Index (PDSI).  
Main areas where aeolian desertification monitoring takes place are shown in Figure S2. Regions  
where negative/positive correlations are significant at the 0.05 level (2-tailed) are shown in blue/red  
colors, and regions where correlations were not significant at the 0.05 level (2-tailed) are shown in  
285 yellow. Detailed correlation results are provided in the supplementary texts and tables.
